# Supplementary material
Source: HighWire-hosted journal article supplement (https://gh.bmj.com/content/9/2/e013444)
Supplement: inline-supplementary-material-1 [file inline-supplementary-material-1.pdf]

**Supplementary materials**

**Title:** Assessing the effectiveness of the expanded hepatitis A vaccination program in China: An interrupted time series design

**Authors:** Yueqian Wu et al.

**Included Files**

Supplementary Methods

Table S1-4

Figure S1

### ***Supplementary Methods***

According to the levels of socioeconomic development, three regions were divided. The eastern region includes 9 provinces: Guangdong, Fujian, Zhejiang, Jiangsu, Shandong, Shanghai, Beijing, Tianjin, and Liaoning. The central region includes 10 provinces: Shanxi, Anhui, Jiangxi, Henan, Hubei, Hunan, Hainan, Jilin, Heilongjiang, and Hebei provinces. The western region includes 12 provinces: Inner Mongolia, Guangxi, Chongqing, Sichuan, Guizhou, Yunnan, Tibet, Shaanxi, Gansu, Qinghai, Ningxia, and Xinjiang. Data of HepA incidence was not available in Hongkong SAR, Macau SAR and Taiwan province.

**Table S1** The DW value before adjusted

| time series    | DW value |
|----------------|----------|
| China          | 0.705    |
| Western Region | 0.746    |
| Central Region | 0.948    |
| Eastern Region | 0.617    |
| 0~4            | 0.402    |
| 5~14           | 0.718    |
| 15~24          | 1.129    |
| 25~64          | 0.954    |
| ≥65            | 0.922    |
| Beijing        | 1.162    |
| Tianjin        | 1.296    |
| Hebei          | 1.052    |
| Shanxi         | 1.405    |
| Inner mongoria | 1.132    |
| Liaoning       | 0.608    |
| Jilin          | 1.097    |
| Heilongjiang   | 1.521    |
| Shanghai       | 1.265    |
| Jiangsu        | 0.730    |
| Zhejiang       | 0.946    |
| Anhui          | 1.185    |
| Fujian         | 1.265    |
| Jiangxi        | 0.736    |

|           |       |
|-----------|-------|
| Shandong  | 1.124 |
| Henan     | 0.870 |
| Hubei     | 1.039 |
| Hunan     | 1.215 |
| Guangdong | 1.148 |
| Guangxi   | 1.349 |
| Hainan    | 1.537 |
| Chongqing | 1.228 |
| Sichuan   | 1.764 |
| Guizhou   | 0.440 |
| Yunnan    | 0.775 |
| Tibet     | 0.643 |
| Shaanxi   | 1.427 |
| Gansu     | 0.455 |
| Qinghai   | 1.192 |
| Ningxia   | 0.660 |
| Xinjiang  | 0.448 |

Abbreviation: DW, Durbin-Watson.

**Table S2** The DW value after adjusted

| time series    | DW value |
|----------------|----------|
| China          | 2.427    |
| Western Region | 2.285    |
| Central Region | 2.301    |
| Eastern Region | 2.413    |
| 0~4            | 2.056    |
| 5~14           | 2.052    |
| 15~24          | 2.108    |
| 25~64          | 2.408    |
| ≥65            | 2.091    |
| Beijing        | 2.171    |
| Tianjin        | 2.037    |
| Hebei          | 2.142    |
| Shanxi         | 2.164    |
| Inner mongoria | 2.105    |
| Liaoning       | 2.411    |
| Jilin          | 2.151    |
| Heilongjiang   | 2.143    |
| Shanghai       | 2.123    |
| Jiangsu        | 2.217    |
| Zhejiang       | 2.118    |
| Anhui          | 2.161    |
| Fujian         | 2.138    |
| Jiangxi        | 2.371    |

|           |       |
|-----------|-------|
| Shandong  | 2.054 |
| Henan     | 2.369 |
| Hubei     | 2.158 |
| Hunan     | 2.074 |
| Guangdong | 2.122 |
| Guangxi   | 2.199 |
| Hainan    | 2.095 |
| Chongqing | 2.103 |
| Sichuan   | 2.004 |
| Guizhou   | 2.346 |
| Yunnan    | 2.240 |
| Tibet     | 2.267 |
| Shaanxi   | 2.091 |
| Gansu     | 2.272 |
| Qinghai   | 2.032 |
| Ningxia   | 2.251 |
| Xinjiang  | 2.033 |

Abbreviation: DW, Durbin-Watson.

**Table S3** Value of different variables

| region | year | month | time    | intervention | pretime | posttime |
|--------|------|-------|---------|--------------|---------|----------|
| China  | 2004 | 1-12  | 1-12    | 0            | 1-12    | 0        |
| China  | 2005 | 1-12  | 13-24   | 0            | 13-24   | 0        |
| China  | 2006 | 1-12  | 25-36   | 0            | 25-36   | 0        |
| China  | 2007 | 1-12  | 37-48   | 0            | 27-48   | 0        |
| China  | 2008 | 1-12  | 49-60   | 1            | 49      | 0-11     |
| China  | 2009 | 1-12  | 61-72   | 1            | 49      | 12-23    |
| China  | 2010 | 1-12  | 73-84   | 1            | 49      | 24-35    |
| China  | 2011 | 1-12  | 85-96   | 1            | 49      | 36-47    |
| China  | 2012 | 1-12  | 97-108  | 1            | 49      | 48-59    |
| China  | 2013 | 1-12  | 109-120 | 1            | 49      | 60-71    |
| China  | 2014 | 1-12  | 121-132 | 1            | 49      | 72-83    |
| China  | 2015 | 1-12  | 133-144 | 1            | 49      | 84-95    |
| China  | 2016 | 1-12  | 145-156 | 1            | 49      | 96-107   |
| China  | 2017 | 1-12  | 157-168 | 1            | 49      | 108-119  |
| China  | 2018 | 1-12  | 169-180 | 1            | 49      | 119-131  |

**Table S4** The result of ITS analysis of 31 provinces in China

| Province | Variable     | RR    | 95% CI*        | Trend**                     |
|----------|--------------|-------|----------------|-----------------------------|
| Beijing  | intervention | 0.543 | 0.388 to 0.759 | Decrease slower             |
|          | pretime      | 0.984 | 0.973 to 0.994 |                             |
|          | posttime     | 0.996 | 0.994 to 0.998 |                             |
| Tianjin  | intervention | 0.396 | 0.198 to 0.792 | No statistical significance |
|          | pretime      | 0.983 | 0.962 to 1.005 |                             |

|                |                     |       |                |                             |
|----------------|---------------------|-------|----------------|-----------------------------|
| Hebei          | <i>posttime</i>     | 1.003 | 0.999 to 1.008 |                             |
|                | <i>intervention</i> | 0.670 | 0.580 to 0.774 |                             |
| Shanxi         | <i>pretime</i>      | 0.992 | 0.988 to 0.997 | Decrease faster             |
|                | <i>posttime</i>     | 0.992 | 0.991 to 0.993 |                             |
| Inner mongoria | <i>intervention</i> | 0.746 | 0.629 to 0.884 | Increase                    |
|                | <i>pretime</i>      | 0.990 | 0.985 to 0.995 |                             |
| Liaoning       | <i>posttime</i>     | 1.004 | 1.003 to 1.005 |                             |
|                | <i>intervention</i> | 0.582 | 0.462 to 0.733 | Decrease faster             |
| Jilin          | <i>pretime</i>      | 0.986 | 0.979 to 0.994 |                             |
|                | <i>posttime</i>     | 0.992 | 0.991 to 0.994 |                             |
| Heilongjiang   | <i>intervention</i> | 0.902 | 0.683 to 1.191 | No statistical significance |
|                | <i>pretime</i>      | 0.976 | 0.967 to 0.985 |                             |
| Shanghai       | <i>posttime</i>     | 1.001 | 0.999 to 1.003 |                             |
|                | <i>intervention</i> | 0.820 | 0.662 to 1.015 | Decrease slower             |
| Jiangsu        | <i>pretime</i>      | 0.968 | 0.962 to 0.975 |                             |
|                | <i>posttime</i>     | 0.993 | 0.992 to 0.994 |                             |
| Zhejiang       | <i>intervention</i> | 0.765 | 0.629 to 0.930 | Decrease slower             |
|                | <i>pretime</i>      | 0.969 | 0.963 to 0.975 |                             |
| Anhui          | <i>posttime</i>     | 0.996 | 0.995 to 0.997 |                             |
|                | <i>intervention</i> | 0.684 | 0.524 to 0.892 | No statistical significance |
| Fujian         | <i>pretime</i>      | 0.983 | 0.975 to 0.991 |                             |
|                | <i>posttime</i>     | 0.999 | 0.997 to 1.000 |                             |
| Jiangxi        | <i>intervention</i> | 0.799 | 0.690 to 0.925 | Decrease slower             |
|                | <i>pretime</i>      | 0.986 | 0.982 to 0.991 |                             |
| Shandong       | <i>posttime</i>     | 0.990 | 0.989 to 0.991 |                             |
|                | <i>intervention</i> | 0.632 | 0.529 to 0.755 | Decrease slower             |
| Henan          | <i>pretime</i>      | 0.984 | 0.978 to 0.989 |                             |
|                | <i>posttime</i>     | 0.990 | 0.988 to 0.991 |                             |
| Hubei          | <i>intervention</i> | 0.976 | 0.838 to 1.137 | Decrease slower             |
|                | <i>pretime</i>      | 0.983 | 0.978 to 0.988 |                             |
| Hubei          | <i>posttime</i>     | 0.991 | 0.990 to 0.992 |                             |
|                | <i>intervention</i> | 1.056 | 0.905 to 1.231 | Decrease slower             |
| Hubei          | <i>pretime</i>      | 0.983 | 0.978 to 0.987 |                             |
|                | <i>posttime</i>     | 0.991 | 0.990 to 0.992 |                             |
| Hubei          | <i>intervention</i> | 0.549 | 0.458 to 0.658 | Decrease faster             |
|                | <i>pretime</i>      | 0.989 | 0.984 to 0.995 |                             |
| Hubei          | <i>posttime</i>     | 0.984 | 0.983 to 0.985 |                             |
|                | <i>intervention</i> | 0.768 | 0.622 to 0.947 | Decrease slower             |
| Hubei          | <i>pretime</i>      | 0.973 | 0.967 to 0.980 |                             |
|                | <i>posttime</i>     | 0.998 | 0.997 to 0.999 |                             |
| Hubei          | <i>intervention</i> | 1.174 | 0.990 to 1.392 | Decrease faster             |
|                | <i>pretime</i>      | 0.994 | 0.989 to 0.999 |                             |
| Hubei          | <i>posttime</i>     | 0.971 | 0.970 to 0.972 |                             |
|                | <i>intervention</i> | 0.858 | 0.751 to 0.981 |                             |

|           |                     |       |                |                 |
|-----------|---------------------|-------|----------------|-----------------|
|           | <i>pretime</i>      | 0.988 | 0.984 to 0.992 | Decrease slower |
|           | <i>posttime</i>     | 0.993 | 0.992 to 0.993 |                 |
| Hunan     | <i>intervention</i> | 0.616 | 0.517 to 0.733 |                 |
|           | <i>pretime</i>      | 1.000 | 0.995 to 1.006 | Decrease faster |
|           | <i>posttime</i>     | 0.998 | 0.990 to 0.993 |                 |
| Guangdong | <i>intervention</i> | 0.919 | 0.819 to 1.031 |                 |
|           | <i>pretime</i>      | 0.998 | 0.990 to 0.997 | Decrease slower |
|           | <i>posttime</i>     | 0.998 | 0.998 to 0.999 |                 |
| Guangxi   | <i>intervention</i> | 0.785 | 0.636 to 0.969 |                 |
|           | <i>pretime</i>      | 0.998 | 0.991 to 1.004 | Decrease faster |
|           | <i>posttime</i>     | 0.992 | 0.990 to 0.993 |                 |
| Hainan    | <i>intervention</i> | 0.791 | 0.581 to 1.078 |                 |
|           | <i>pretime</i>      | 0.984 | 0.967 to 9.986 | Decrease slower |
|           | <i>posttime</i>     | 0.993 | 0.981 to 0.985 |                 |
| Chongqing | <i>intervention</i> | 0.756 | 0.652 to 0.877 |                 |
|           | <i>pretime</i>      | 0.984 | 0.980 to 0.989 | Decrease slower |
|           | <i>posttime</i>     | 0.993 | 0.992 to 0.993 |                 |
| Sichuan   | <i>intervention</i> | 0.756 | 0.759 to 0.983 |                 |
|           | <i>pretime</i>      | 0.984 | 0.985 to 0.993 | Decrease slower |
|           | <i>posttime</i>     | 0.993 | 0.990 to 0.992 |                 |
| Guizhou   | <i>intervention</i> | 0.774 | 0.638 to 0.939 |                 |
|           | <i>pretime</i>      | 1.005 | 0.999 to 1.011 | Decrease faster |
|           | <i>posttime</i>     | 0.974 | 0.973 to 0.975 |                 |
| Yunnan    | <i>intervention</i> | 0.532 | 0.452 to 0.628 |                 |
|           | <i>pretime</i>      | 1.009 | 1.003 to 1.014 | Decrease faster |
|           | <i>posttime</i>     | 0.986 | 0.985 to 0.987 |                 |
| Tibet     | <i>intervention</i> | 0.859 | 0.617 to 1.195 |                 |
|           | <i>pretime</i>      | 0.995 | 0.988 to 0.992 | Decrease faster |
|           | <i>posttime</i>     | 0.990 | 0.775 to 0.947 |                 |
| Shaanxi   | <i>intervention</i> | 0.889 | 0.749 to 1.057 |                 |
|           | <i>pretime</i>      | 0.986 | 0.981 to 0.991 | Decrease slower |
|           | <i>posttime</i>     | 0.987 | 0.986 to 0.988 |                 |
| Gansu     | <i>intervention</i> | 0.953 | 0.811 to 1.121 |                 |
|           | <i>pretime</i>      | 0.993 | 0.988 to 0.999 | Decrease faster |
|           | <i>posttime</i>     | 0.983 | 0.982 to 0.984 |                 |
| Qinghai   | <i>intervention</i> | 0.904 | 0.727 to 1.125 |                 |
|           | <i>pretime</i>      | 1.003 | 0.996 to 1.010 | Decrease faster |
|           | <i>posttime</i>     | 0.992 | 0.990 to 0.993 |                 |
| Ningxia   | <i>intervention</i> | 0.520 | 0.376 to 0.718 |                 |
|           | <i>pretime</i>      | 1.011 | 1.000 to 1.021 | Decrease faster |
|           | <i>posttime</i>     | 0.982 | 0.980 to 0.984 |                 |
| Xinjiang  | <i>intervention</i> | 0.354 | 0.287 to 0.437 |                 |
|           | <i>pretime</i>      | 1.021 | 1.014 to 1.028 | Decrease faster |
|           | <i>posttime</i>     | 0.997 | 0.995 to 0.998 |                 |

\*:CI is the confidence interval.

\*\* : The change in the trend of HepA incidence between before and after EHAP.

Abbreviation: HepA, hepatitis A; EHAP, expanded HepA vaccination program; ITS, interrupted time series.

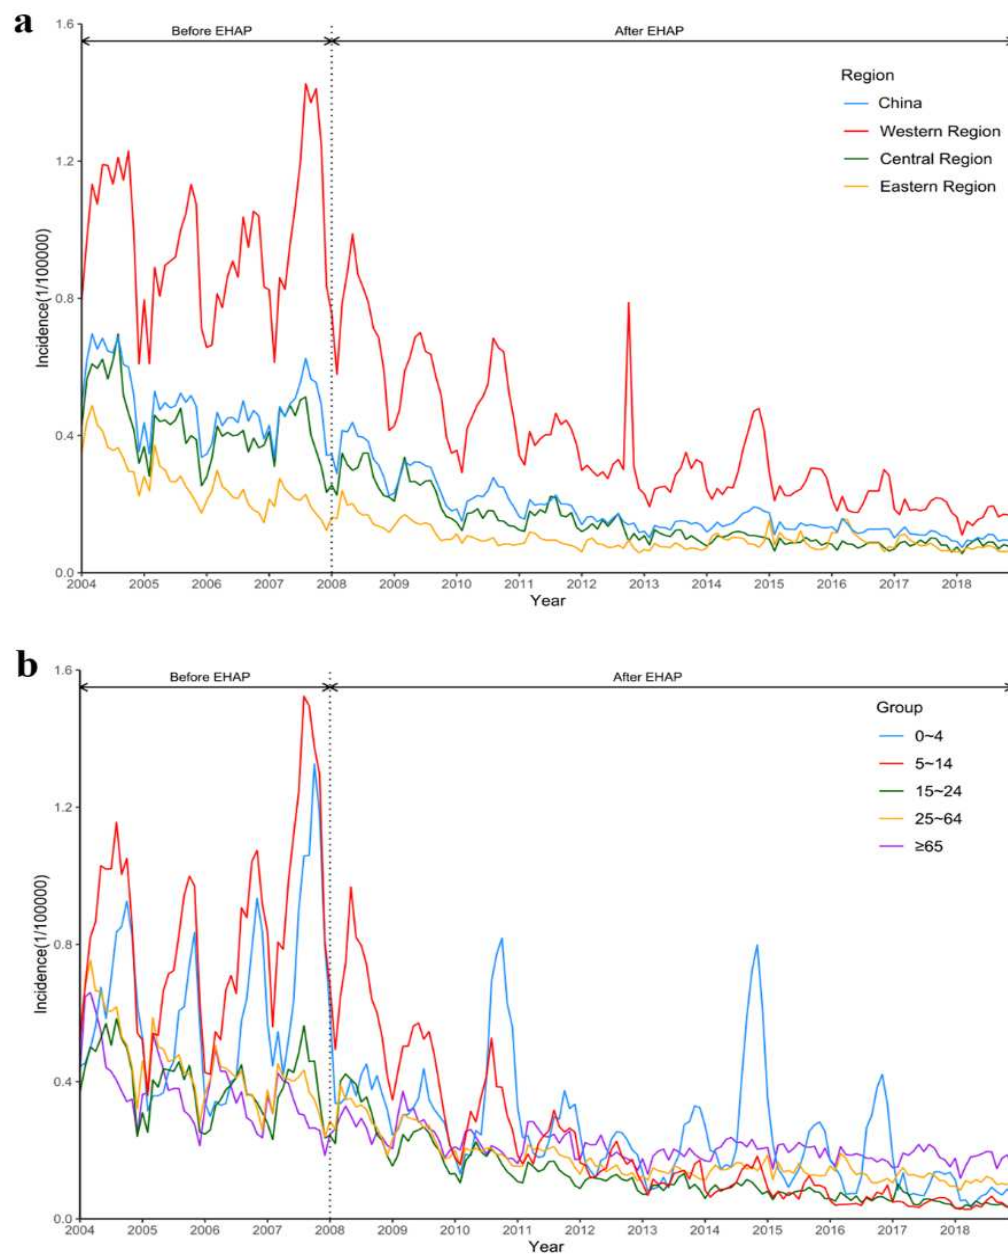

**Figure S1** The trends in the HepA incidence in China, three economic regions, and five age groups from 2004 to 2018.(a) China and three economic regions. (b) Five age groups.

Abbreviation: HepA, hepatitis A.
